# Supplementary material for: Improved Gas Sensing Capabilities of MoS2/Diamond Heterostructures at Room Temperature
Source: PubMed Central journal article supplement (PMC10360066; doi:10.1021/acsami.3c04438), 2023-07-03
Supplement: am3c04438_si_001.pdf [file am3c04438_si_001.pdf]

Supplementary information to: **Improved Gas Sensing Capabilities of MoS<sub>2</sub> / Diamond Heterostructures at Room Temperature**

Michal Kočí<sup>1,2,\*</sup>, Tibor Izsák<sup>3</sup>, Gabriel Vanko<sup>3</sup>, Michaela Sojková<sup>3</sup>, Jana Hrdá<sup>3</sup>, Ondrej Szabó<sup>1</sup>, Miroslav Husák<sup>2</sup>, Karol Végső<sup>4,5</sup>, Marian Varga<sup>1,3</sup>, Alexander Kromka<sup>1</sup>

<sup>1</sup> Department of Semiconductors, Institute of Physics of the Czech Academy of Sciences, Cukrovarnická 10/112, Prague 6 162 00, Czech Republic

<sup>2</sup> Department of Microelectronics, Faculty of Electrical Engineering, Czech Technical University in Prague, Technická 2, Prague 6, 166 27, Czech Republic

<sup>3</sup> Department of Microelectronics and Sensors, Institute of Electrical Engineering, Slovak Academy of Sciences, Dúbravská Cesta 9, Bratislava, 841 04, Slovak Republic

<sup>4</sup> Department of Multilayers and Nanostructures, Institute of Physics, Slovak Academy of Sciences, Dúbravská Cesta 9, Bratislava, 845 11, Slovak Republic

<sup>5</sup> Centre for Advanced Materials Application (CEMEA), Slovak Academy of Sciences, Dúbravská Cesta 5807/9, Bratislava, 845 11, Slovak Republic

\*Corresponding author e-mail: kocim@fzu.cz, kocimic1@fel.cvut.cz

## 1. SEM images and GIWAXS maps

The MoS<sub>2</sub> layer was prepared on three different substrates: Si, SiO<sub>2</sub>/Si, and diamond-coated SiO<sub>2</sub> /Si (H-NCD/SiO<sub>2</sub> /Si). The surface morphology of the samples is compared in Figure S1 together with bare Si and bare SiO<sub>2</sub>/Si samples. In addition, Figure S2 compares the GIWAXS reciprocal space maps of the MoS<sub>2</sub>/Si and MoS<sub>2</sub>/SiO<sub>2</sub>/Si samples.

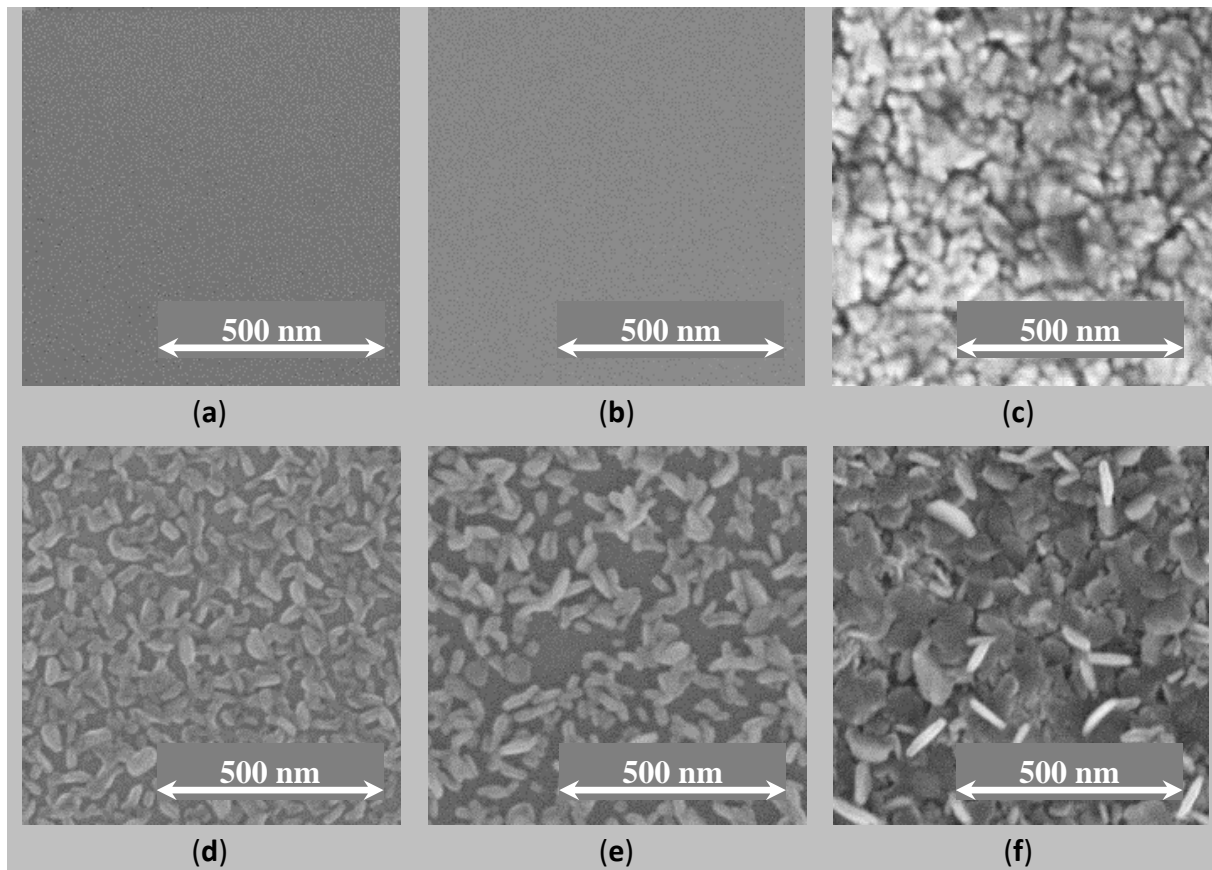

**Figure S1** SEM images of different samples: (a) bare Si, (b) SiO<sub>2</sub>/Si, (c) H-NCD/SiO<sub>2</sub>/Si, (d) MoS<sub>2</sub>/Si, (e) MoS<sub>2</sub>/SiO<sub>2</sub>/Si and (f) MoS<sub>2</sub>/H-NCD/SiO<sub>2</sub>/Si.

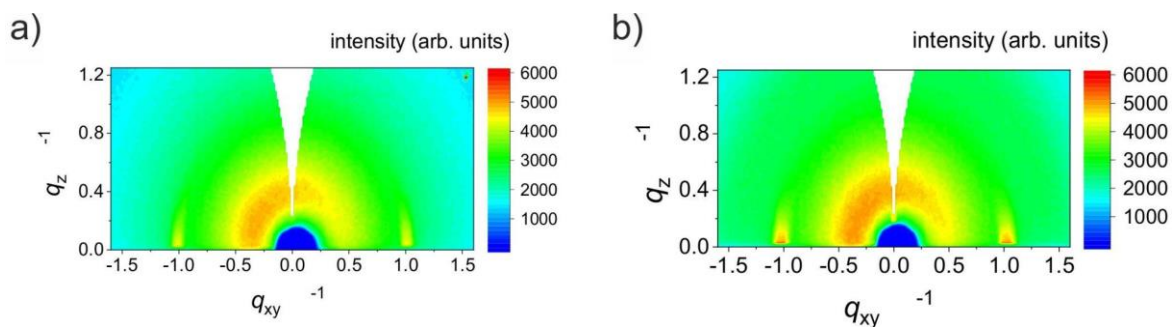

**Figure S2** Comparison of GIWAXS reciprocal space maps of the (a) MoS<sub>2</sub>/Si and (b) MoS<sub>2</sub>/SiO<sub>2</sub>/Si samples.

## 2. Gas sensor testing setup

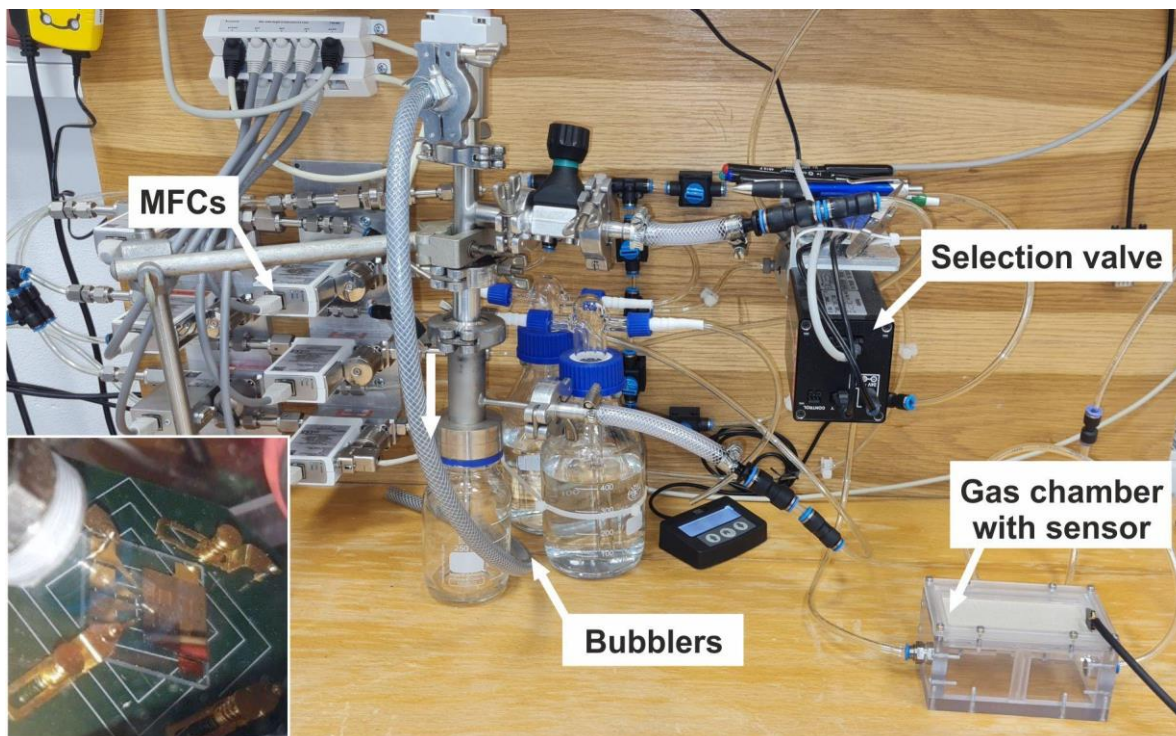

**Figure S3** Photo of the experimental setup for gas sensor testing. Inset: wire-bonded sensor in the gas chamber.

## 3. Gas responses of reference samples

The time response of MoS<sub>2</sub> and H-NCD/SiO<sub>2</sub> conductivity gas sensors on Si substrate to three different types of gas (oxidizing, reducing and synthetic air) was measured in a test chamber at room temperature (about 22 °C). The measured enduring resistance of the MoS<sub>2</sub>/Si was as low as 0.6 Ω. The absence of the insulating layer between the MoS<sub>2</sub> and the Si substrate causes low resistance, while silicon represents a shortcut. The steady-state value of the NCD/SiO<sub>2</sub>/Si sample was measured at 17.8 kΩ.

The MoS<sub>2</sub> and NCD/SiO<sub>2</sub>/Si impedance-based sensors responded poorly to the reducing (NH<sub>3</sub>) and oxidizing (NO<sub>2</sub>) gases at low temperatures. The NCD/SiO<sub>2</sub>/Si only responds to 90 % humidity by changing its resistance. It can be therefore concluded that MoS<sub>2</sub>/Si is unsuitable as a gas sensing layer, but the growth of MoS<sub>2</sub> was well-optimized on Si substrates as a reference.

### 3.1 Gas response of the H-NCD layer

The second sample that was tested was the NCD film grown on the SiO<sub>2</sub>/Si substrate. Figure S4 shows the change in resistance and its percentage change dependence over time as a function of different gases. Unlike MoS<sub>2</sub>, the bulk bare NCD layer is an insulator. However, it could exhibit P-type subsurface conductivity if hydrogen atoms sufficiently terminate its surface. The steady-state value of the resistance was measured at 17.8 kΩ. The gas response of the NCD has a low value due to the low temperature. The NCD/SiO<sub>2</sub>/Si sample, similar to the

MoS<sub>2</sub>/Si sample, only reacts to 90 % humidity, reducing the resistance by 17 %. Therefore, the prepared NCD sample is unsuitable for gas sensing applications at room temperature. The response to gases in H-NCD is caused by a chemical reaction forming counter-ions on its surface via the electron transfer model. At room temperature, the chemical reaction of a pure material is not supported by higher temperature or a chemical catalyst. For this reason, the chemical reaction is minimal, and the response is immeasurable. It is necessary to use higher temperatures or another material as a catalyst to increase the gas response. The responses at 40 °C are shown in Figure S5 for a) reducing gas ammonia and b) oxidizing gas nitrogen dioxide. The responses equal to theoretical gas interaction model at higher temperature.

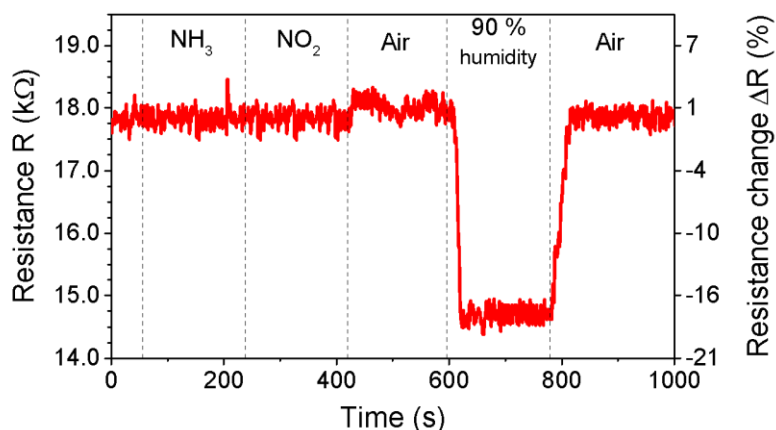

**Figure S4** Time response of H-NCD/SiO<sub>2</sub>/Si to three types of gases (ammonia, nitrogen dioxide, and synthetic air with 90 % humidity).

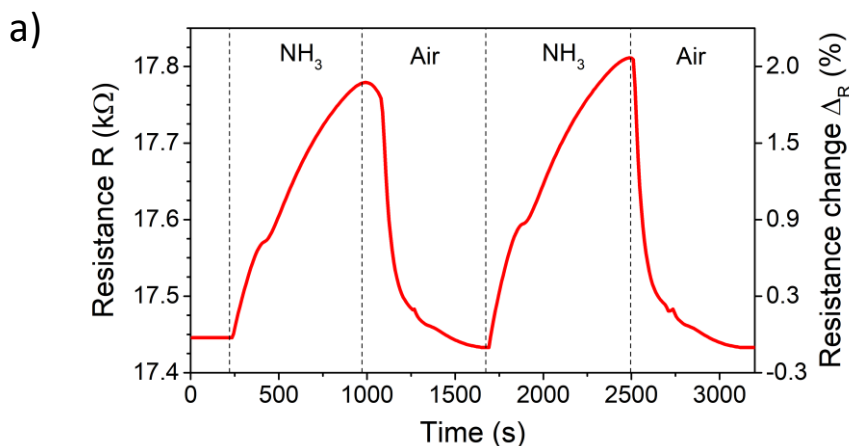

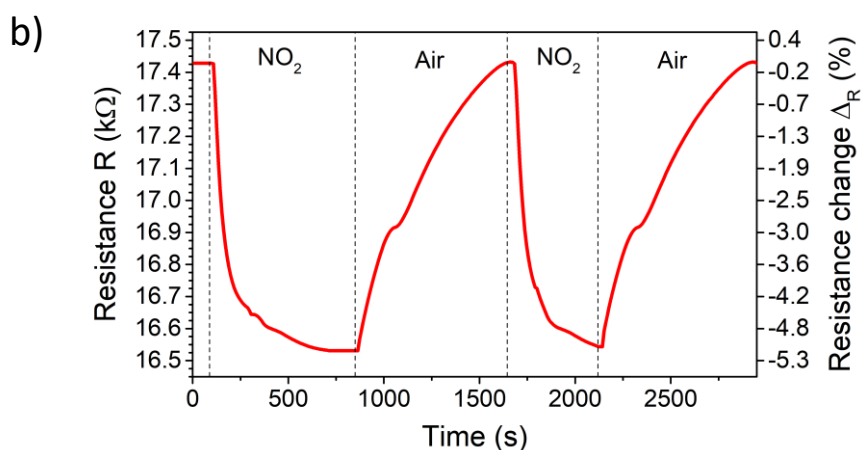

**Figure S5** Time response of H-NCD/SiO<sub>2</sub>/Si at 40 °C to a) ammonia NH<sub>3</sub> and b) nitrogen dioxide NO<sub>2</sub>

#### 4. Verification of synergy effect between MoS<sub>2</sub> and H-NCD

The measurement of the water contact angle indirectly verifies the quality of the hydrogen termination. The H-NCD is hydrophobic. A higher contact angle means more terminated hydrogen on the surface and, thus, a better response to the exposed gas. The minimal contact angle for good sensing properties is about 90 °. The fabricated layers revealed similar contact angles over 100 °.

The MoS<sub>2</sub>/NCD/SiO<sub>2</sub>/Si sample was modified to verify the synergistic effect between the H-NCD and MoS<sub>2</sub> nanoflake layers. Firstly, the contact angles and responses of the MoS<sub>2</sub>/NCD/SiO<sub>2</sub>/Si and NCD reference layers were measured. Subsequently, the samples were placed in oxygen plasma to replace H-termination by O-termination, which does not reveal the 2DHG subsurface conductivity. The surface functionalization by oxygen was performed in a MW O<sub>2</sub> plasma chamber (Tesla system, 100W, 60 Pa, 50 sccm of H<sub>2</sub>, 4 min). These layers will be further referred to as O-NCD layers. The contact angles decreased to a low value for both samples because the oxygen termination is hydrophilic. In this case, the MoS<sub>2</sub>/O-NCD/SiO<sub>2</sub>/Si sensor revealed properties well known for the N-type MoS<sub>2</sub>/SiO<sub>2</sub>/Si sensor. The response is smaller than that of traditional sensors, but a sign of change in the MoS<sub>2</sub> layer can still recognize the type of gas, i.e., the resistivity increases for oxidizing (NO<sub>2</sub>) and decreases for reducing (NH<sub>3</sub>) gas. Then, the oxidized MoS<sub>2</sub>/O-NCD/SiO<sub>2</sub>/Si sensor was exposed to the low-temperature H-termination process, referred to as the recovery of the H-termination MoS<sub>2</sub>/H<sub>rec</sub>-NCD heterostructure, which resulted in the gas responses observed for the initial MoS<sub>2</sub>/H-NCD heterostructure. The surface functionalization by hydrogen was performed in a focused MW plasma CVD chamber (Aixtron P6 system, 300 sccm of H<sub>2</sub>, 10 min, 300 °C). These layers are further referred to as H<sub>rec</sub>-NCD. Noticeably, samples exposed to the low temperature hydrogenation process revealed lower contact angles (<60 °) than the samples hydrogenated by the high-temperature process provided by the focused plasma system (contact angles >100 °). A lower temperature was used for recovery because higher temperature caused destruction of the wire bonding and MoS<sub>2</sub> active layer. Consequently, the induced surface conductivity should also be less effective, which was confirmed by the lower response of the



recovered MoS<sub>2</sub>/H<sub>rec</sub>-NCD heterostructure. Therefore, the response is lower but shows a similar course as before oxygen termination.

**Table S1** Water contact angle measurements.

|                                                              | MoS <sub>2</sub> on diamond                                                                                                          | Reference diamond                                                                                                                     |
|--------------------------------------------------------------|--------------------------------------------------------------------------------------------------------------------------------------|---------------------------------------------------------------------------------------------------------------------------------------|
| Fabricated and measured layer<br>(H-termination NCD)         | <p style="text-align: center;"><b>106.5 °</b></p> 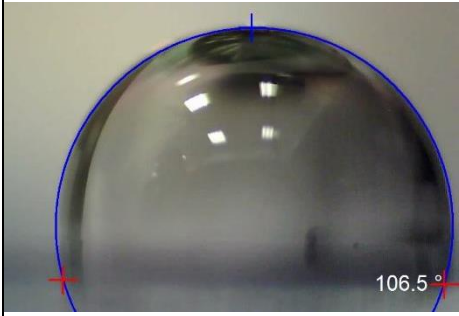  | <p style="text-align: center;"><b>113.8 °</b></p>   |
| After oxygen plasma<br>(O-termination NCD)                   | <p style="text-align: center;"><b>Too low</b></p>  | <p style="text-align: center;"><b>14.4 °</b></p>   |
| After hydrogen plasma*<br>(Recovery of H-termination)        | <p style="text-align: center;"><b>56.5 °</b></p>  | <p style="text-align: center;"><b>58.9 °</b></p>  |
| * partial surface termination due to low-temperature process |                                                                                                                                      |                                                                                                                                       |

**Table S2** Measured responses of MoS<sub>2</sub>/H-NCD/SiO<sub>2</sub>/Si and MoS<sub>2</sub>/O-NCD/SiO<sub>2</sub>/Si.

| MoS <sub>2</sub> / NCD / SiO <sub>2</sub> / Si heterostructure                                                                    |  |
|-----------------------------------------------------------------------------------------------------------------------------------|--|
| <p>Fabricated and measured layer<br/>(H-termination NCD)</p>                                                                      |  |
| <p>After oxygen plasma<br/>(O-termination NCD)</p>                                                                                |  |
| <p>After hydrogen plasma*<br/>(Recovery of H-termination)</p> <p>* partial surface termination due to low-temperature process</p> |  |
